# Supplementary material for: Alterations in Gut Glutamate Metabolism Associated with Changes in Gut Microbiota Composition in Children with Autism Spectrum Disorder
Source: PubMed Central journal article supplement (PMC6351726; doi:10.1128/msystems.00321-18), 2019-01-29

**a**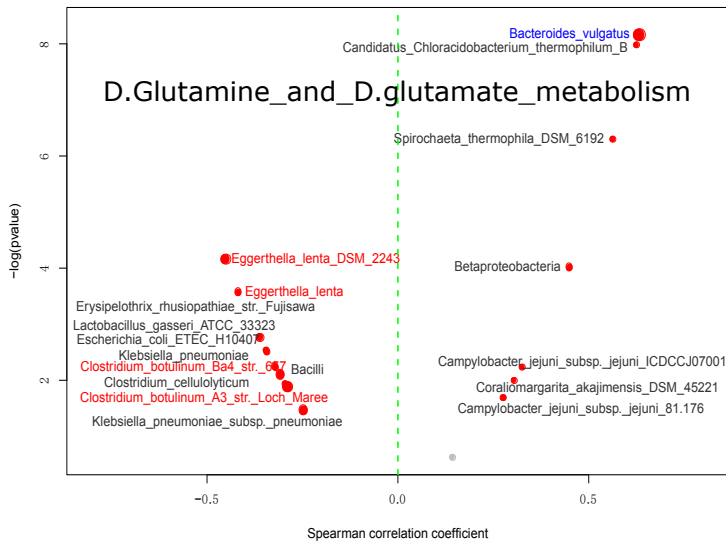**b**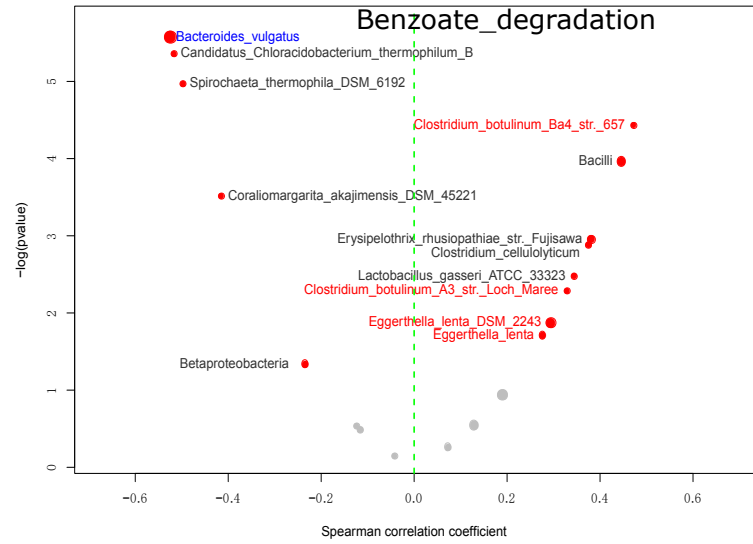**c**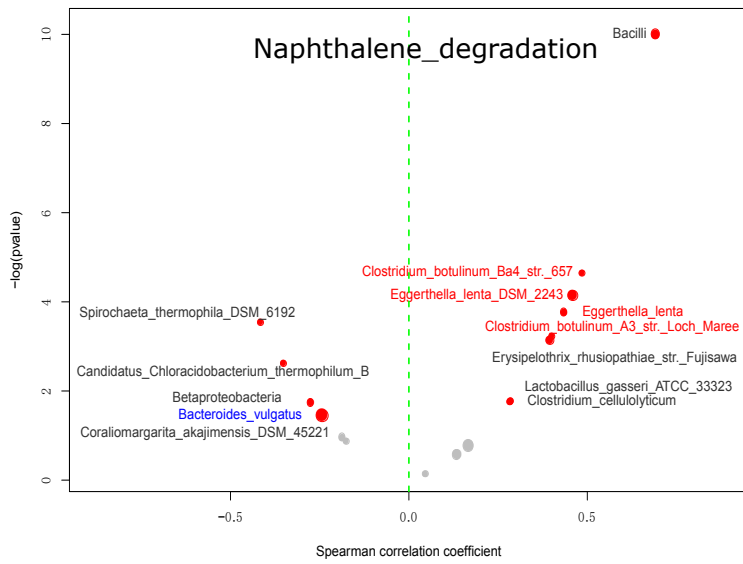**d**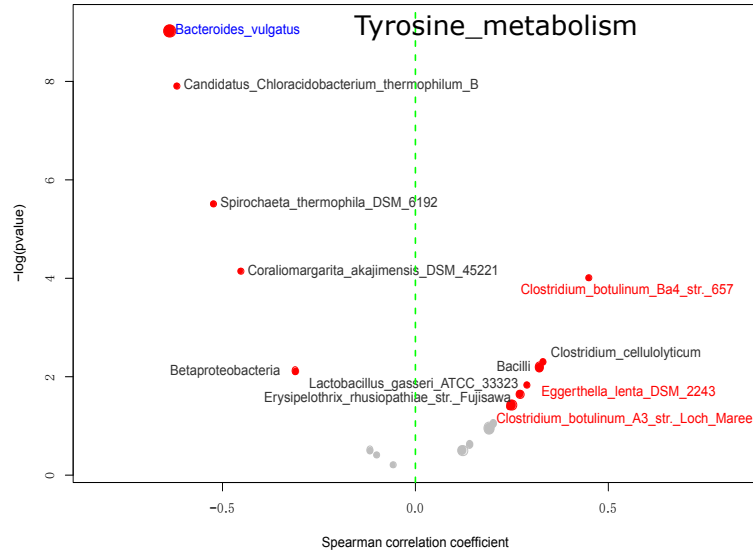

Supplement: mSystems.00321-18-sf003.pdf [file mSystems.00321-18-sf003.pdf]
