# Supplementary material for: Alterations in Gut Glutamate Metabolism Associated with Changes in Gut Microbiota Composition in Children with Autism Spectrum Disorder
Source: PubMed Central journal article supplement (PMC6351726; doi:10.1128/msystems.00321-18), 2019-01-29

## Part A. GI problems effect on microbiota

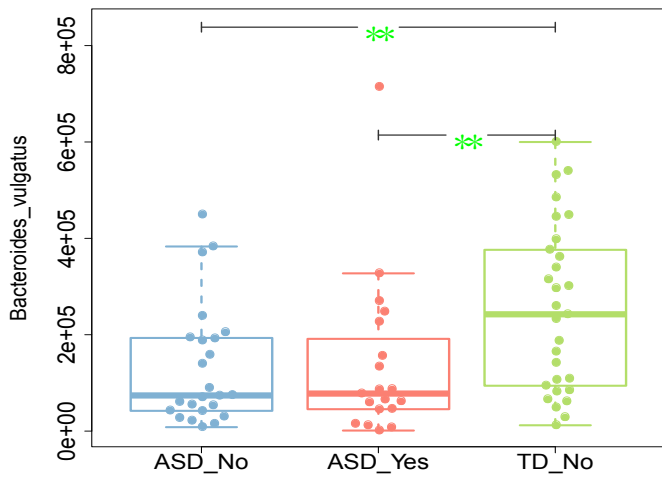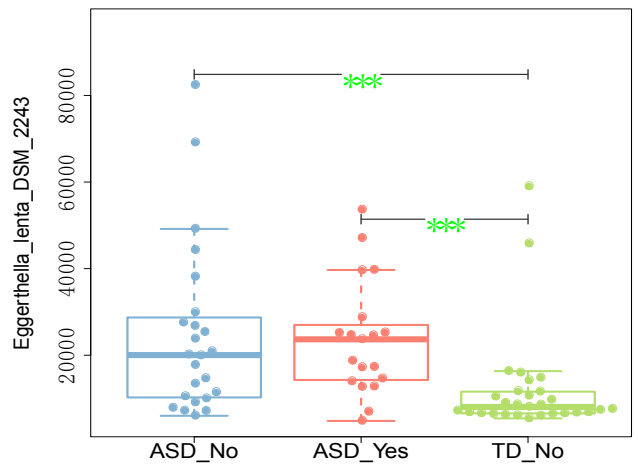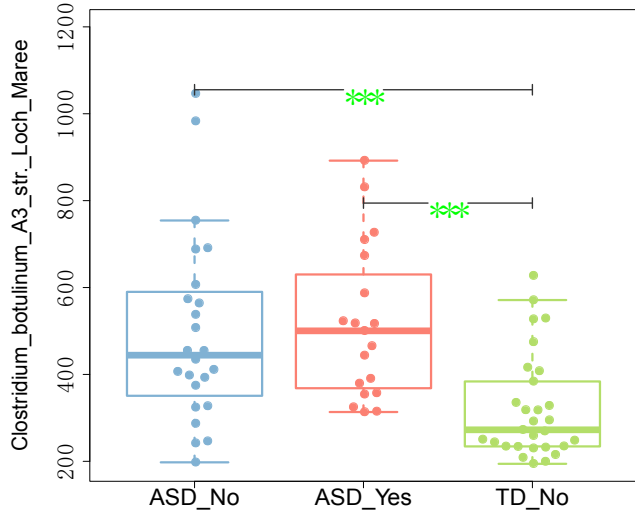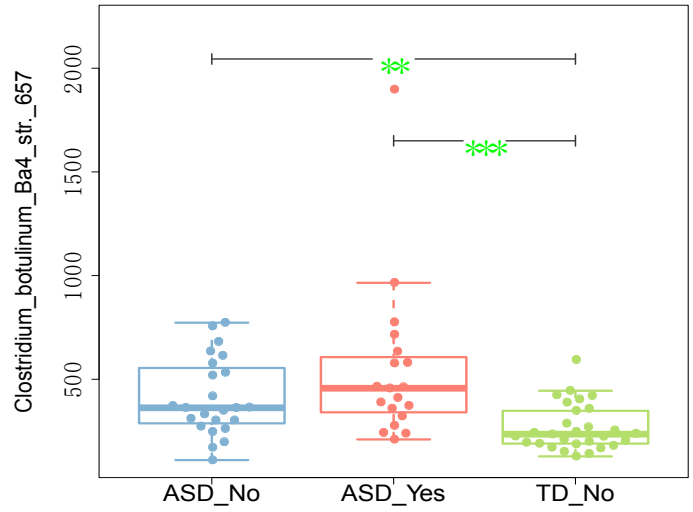

## Part B. GI problems effect on metabolite

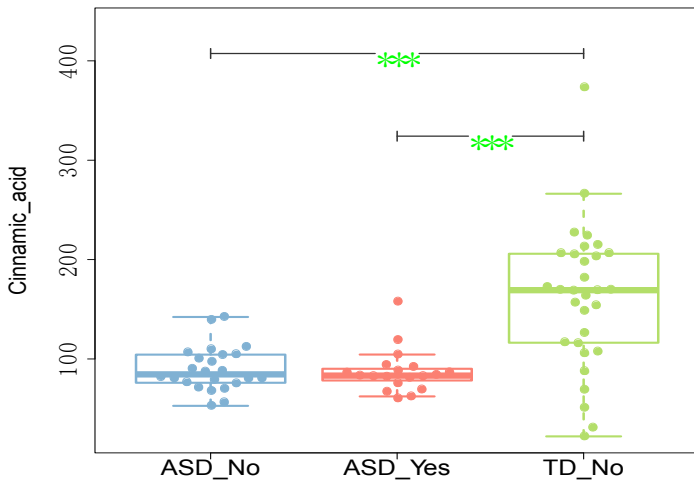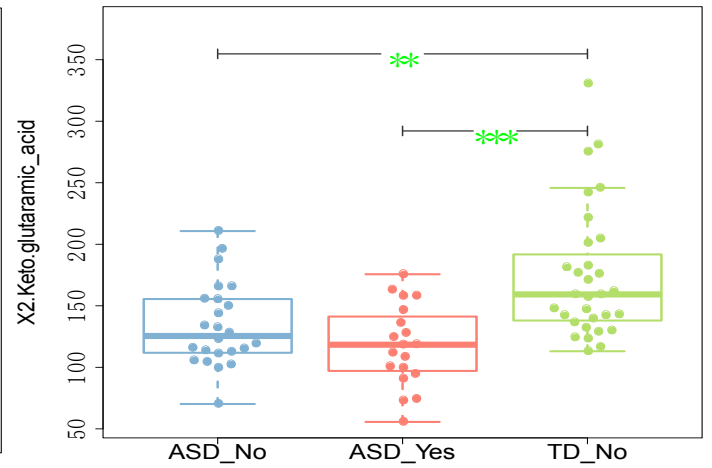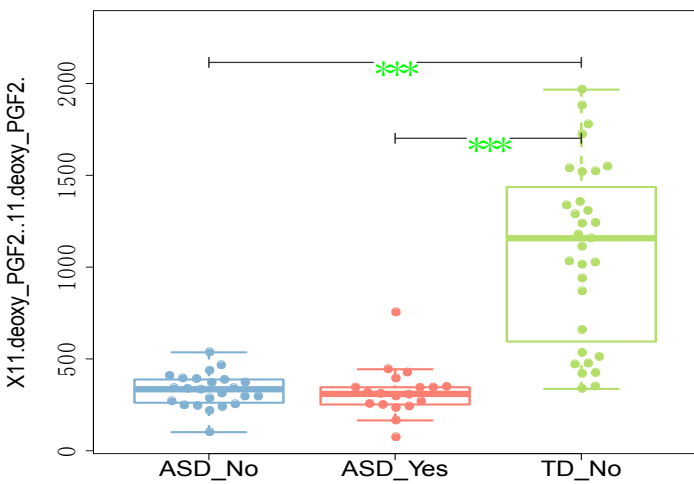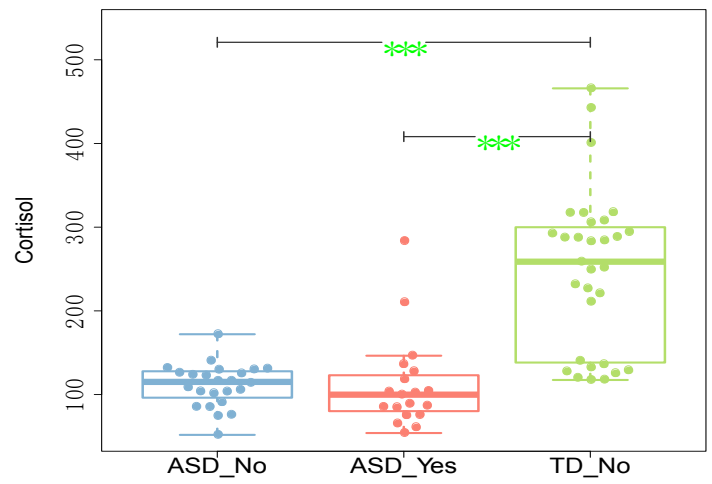

Supplement: mSystems.00321-18-sf006.pdf [file mSystems.00321-18-sf006.pdf]
