# Supplementary material for: Alterations in Gut Glutamate Metabolism Associated with Changes in Gut Microbiota Composition in Children with Autism Spectrum Disorder
Source: PubMed Central journal article supplement (PMC6351726; doi:10.1128/msystems.00321-18), 2019-01-29

### Part A. effect of gender on microbiota

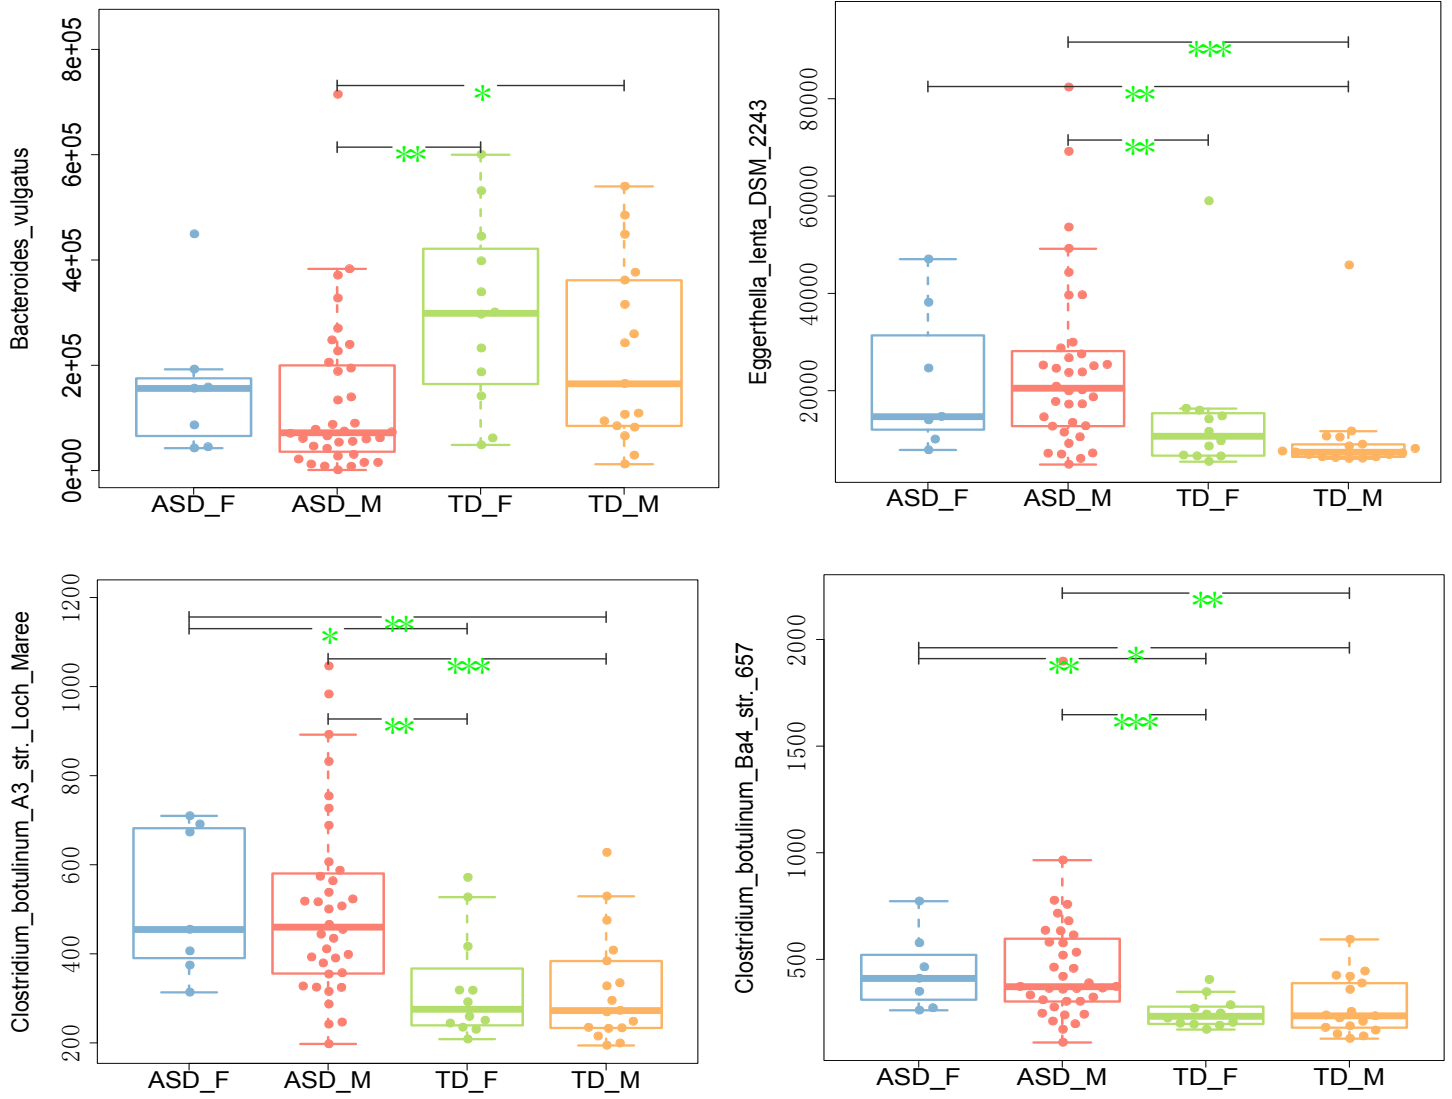

### Part B. effect of gender on metabolites

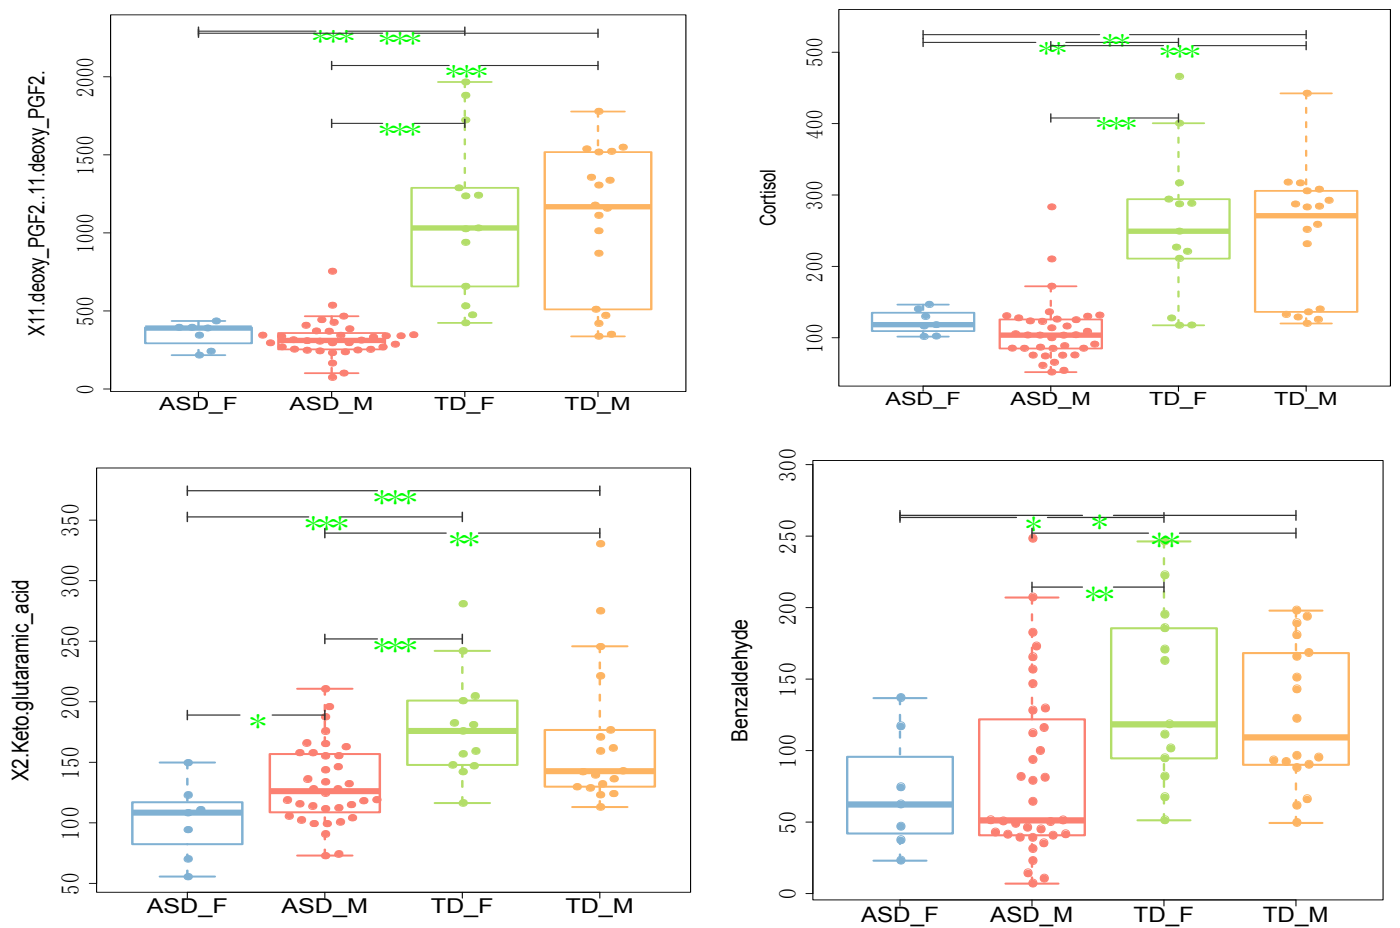

Supplement: mSystems.00321-18-sf007.pdf [file mSystems.00321-18-sf007.pdf]
